# Supplementary material
Source: PubMed Central journal article supplement (PMC7315125)

**A**

### CD47 : TB Metasignature

GSE19435  
 GSE19439  
 GSE19444  
 GSE19491  
 GSE28623  
 GSE34608  
 GSE41055  
 GSE42825  
 GSE42826  
 GSE42830  
 GSE42834  
 GSE56153

Summary

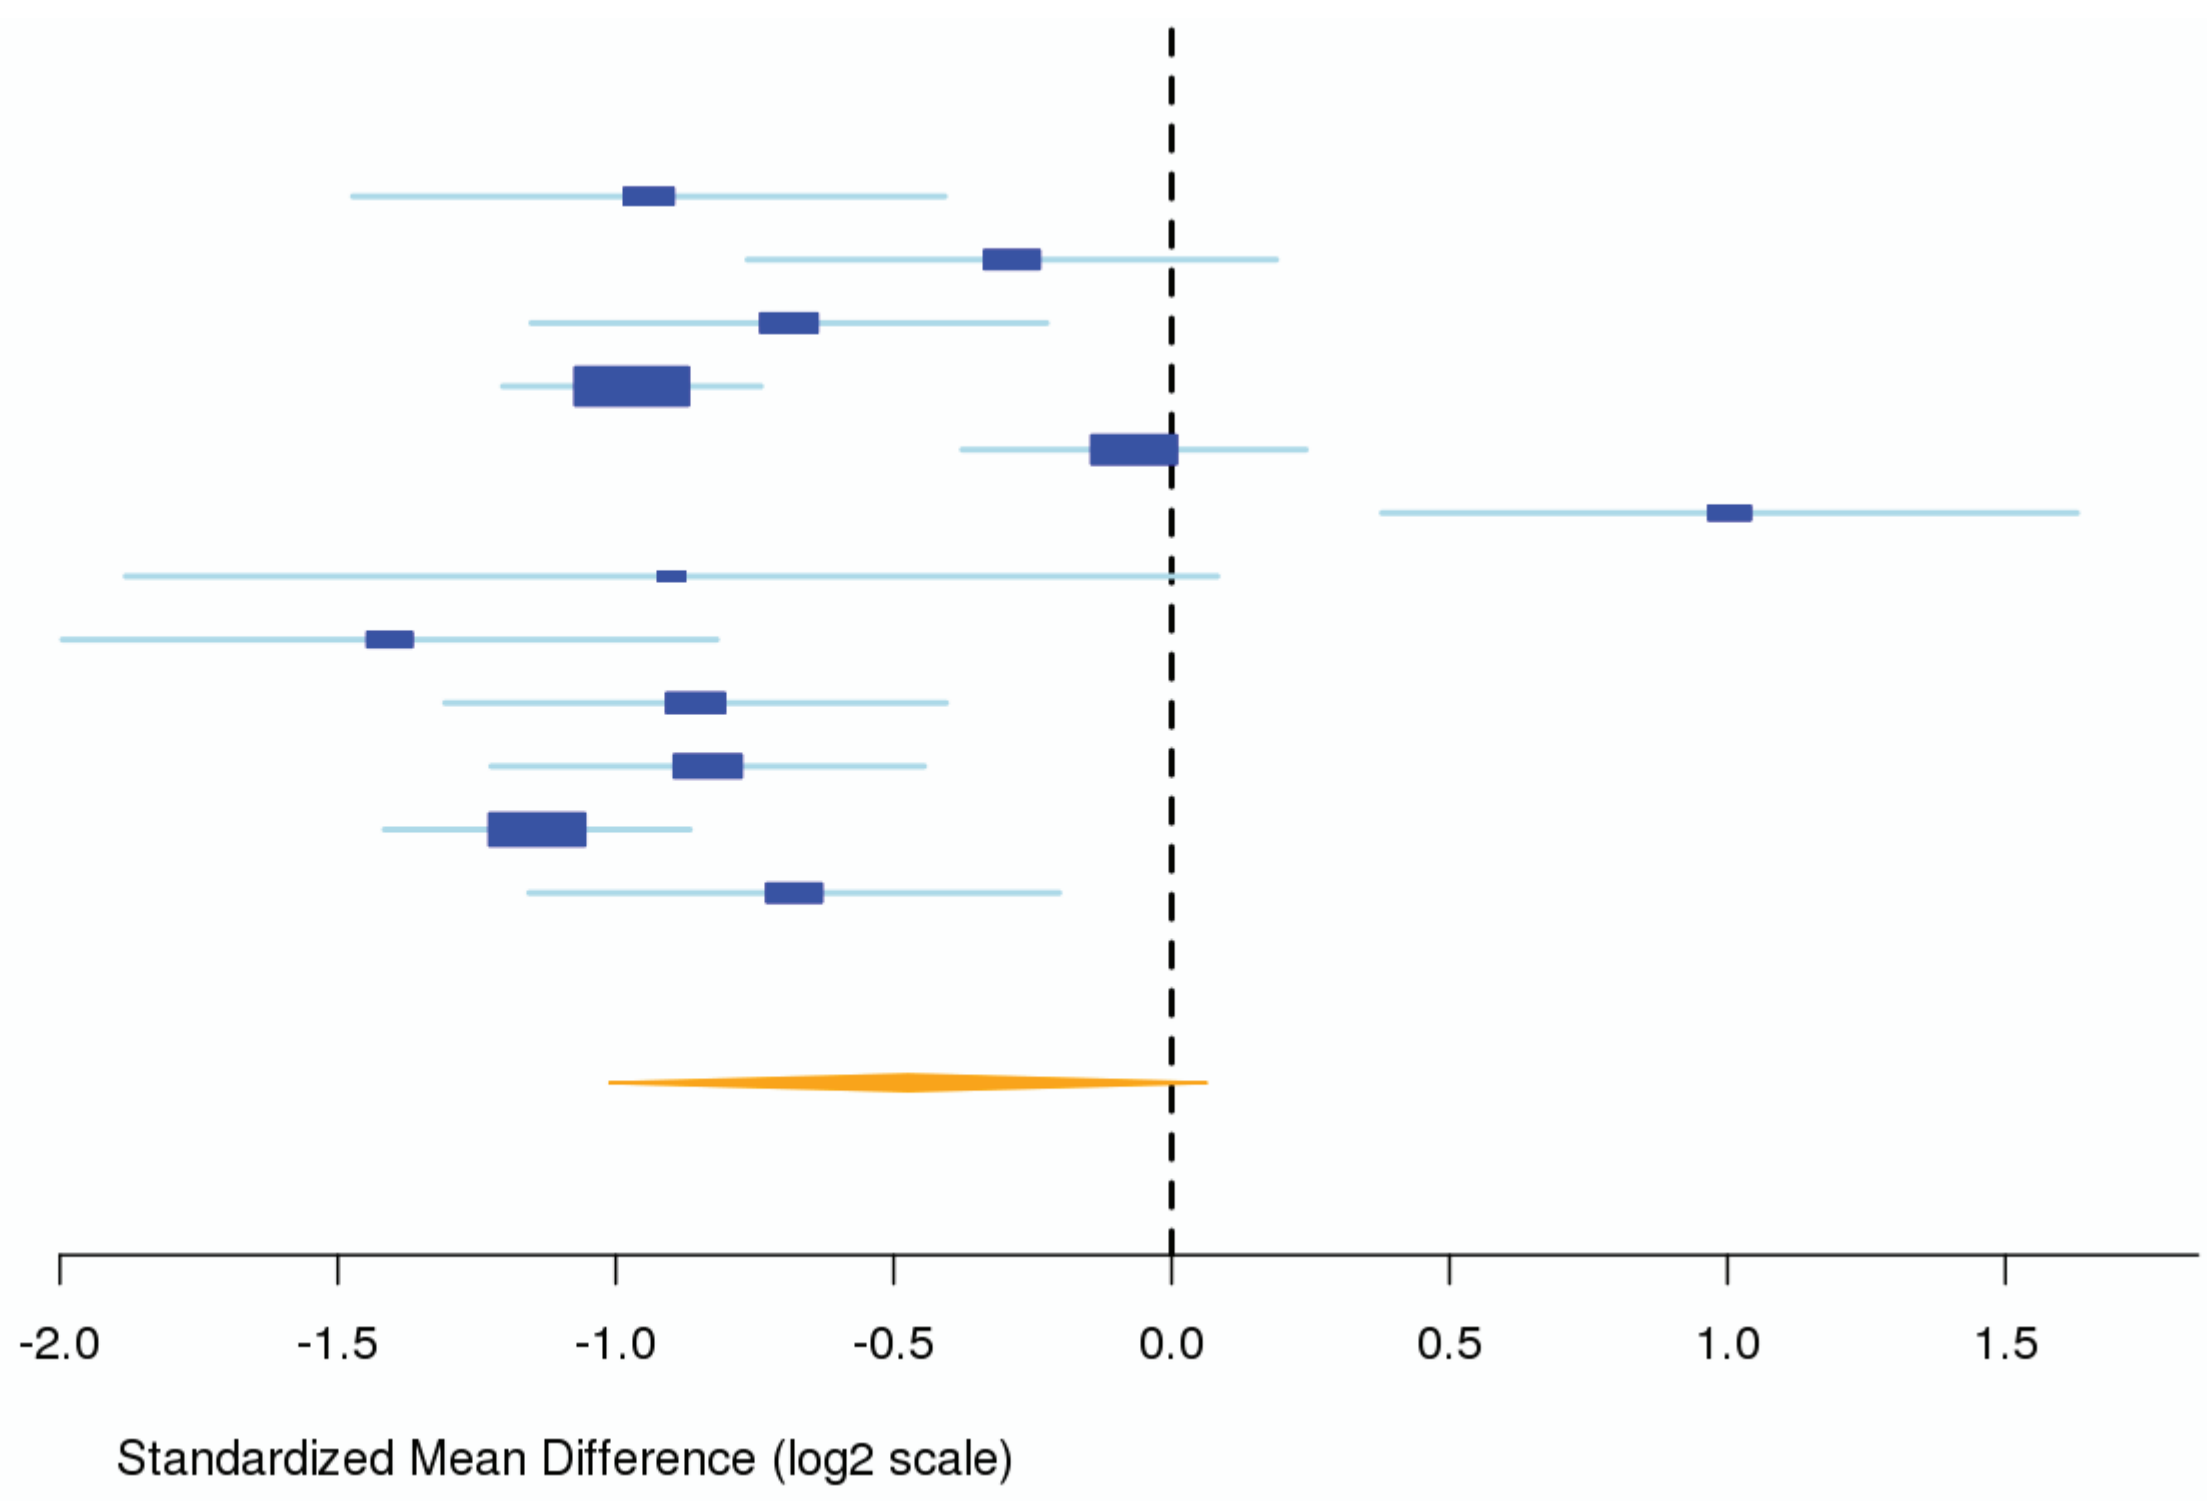**B**

### CD47 : HCV Metasignature

GEM14323  
 GEM2067  
 GEM20948  
 GEM37715  
 GEM38597

Summary

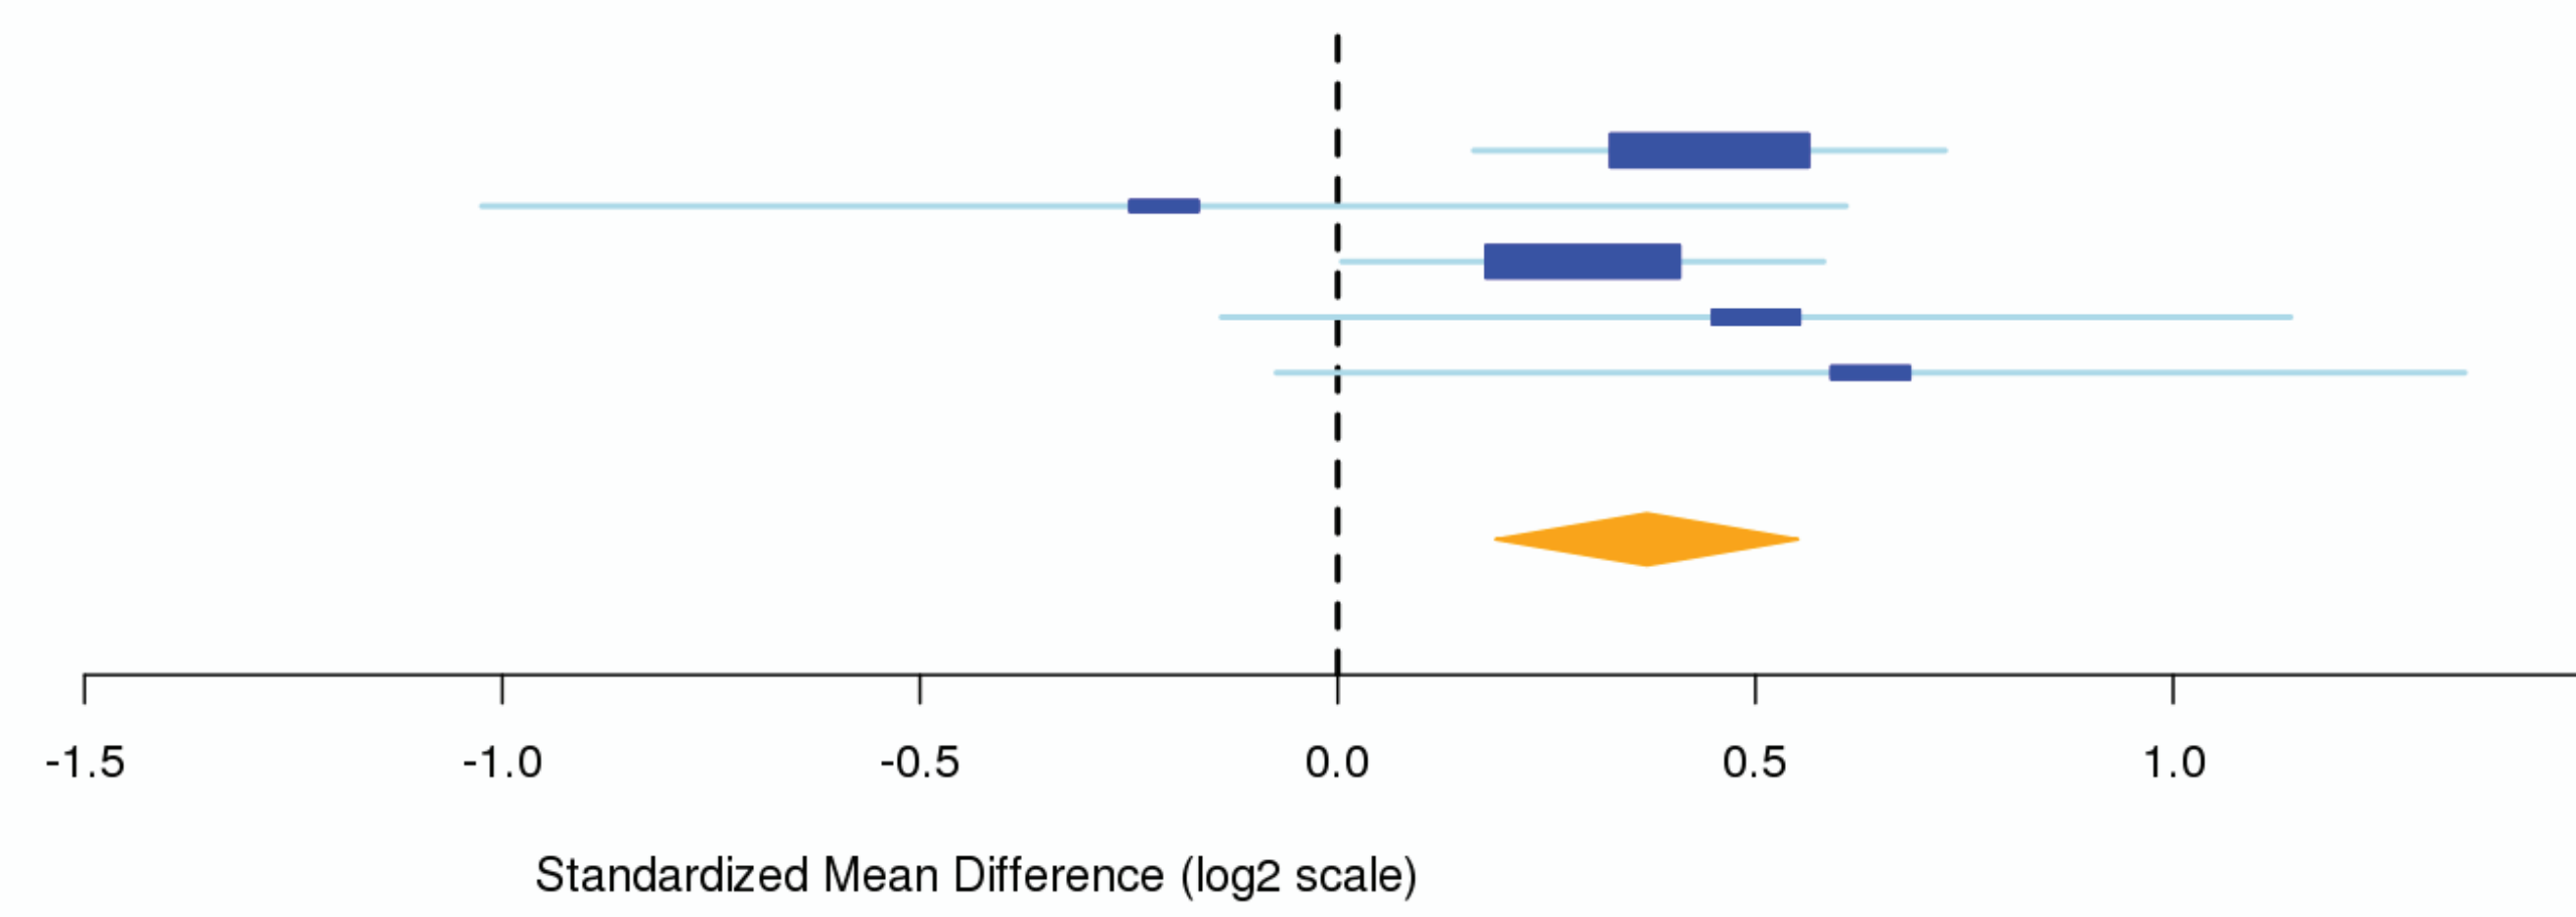

Supplement: mBio.01293-20-sf002.pdf [file mBio.01293-20-sf002.pdf]
