# Supplementary material
Source: PubMed Central journal article supplement (PMC7315125)

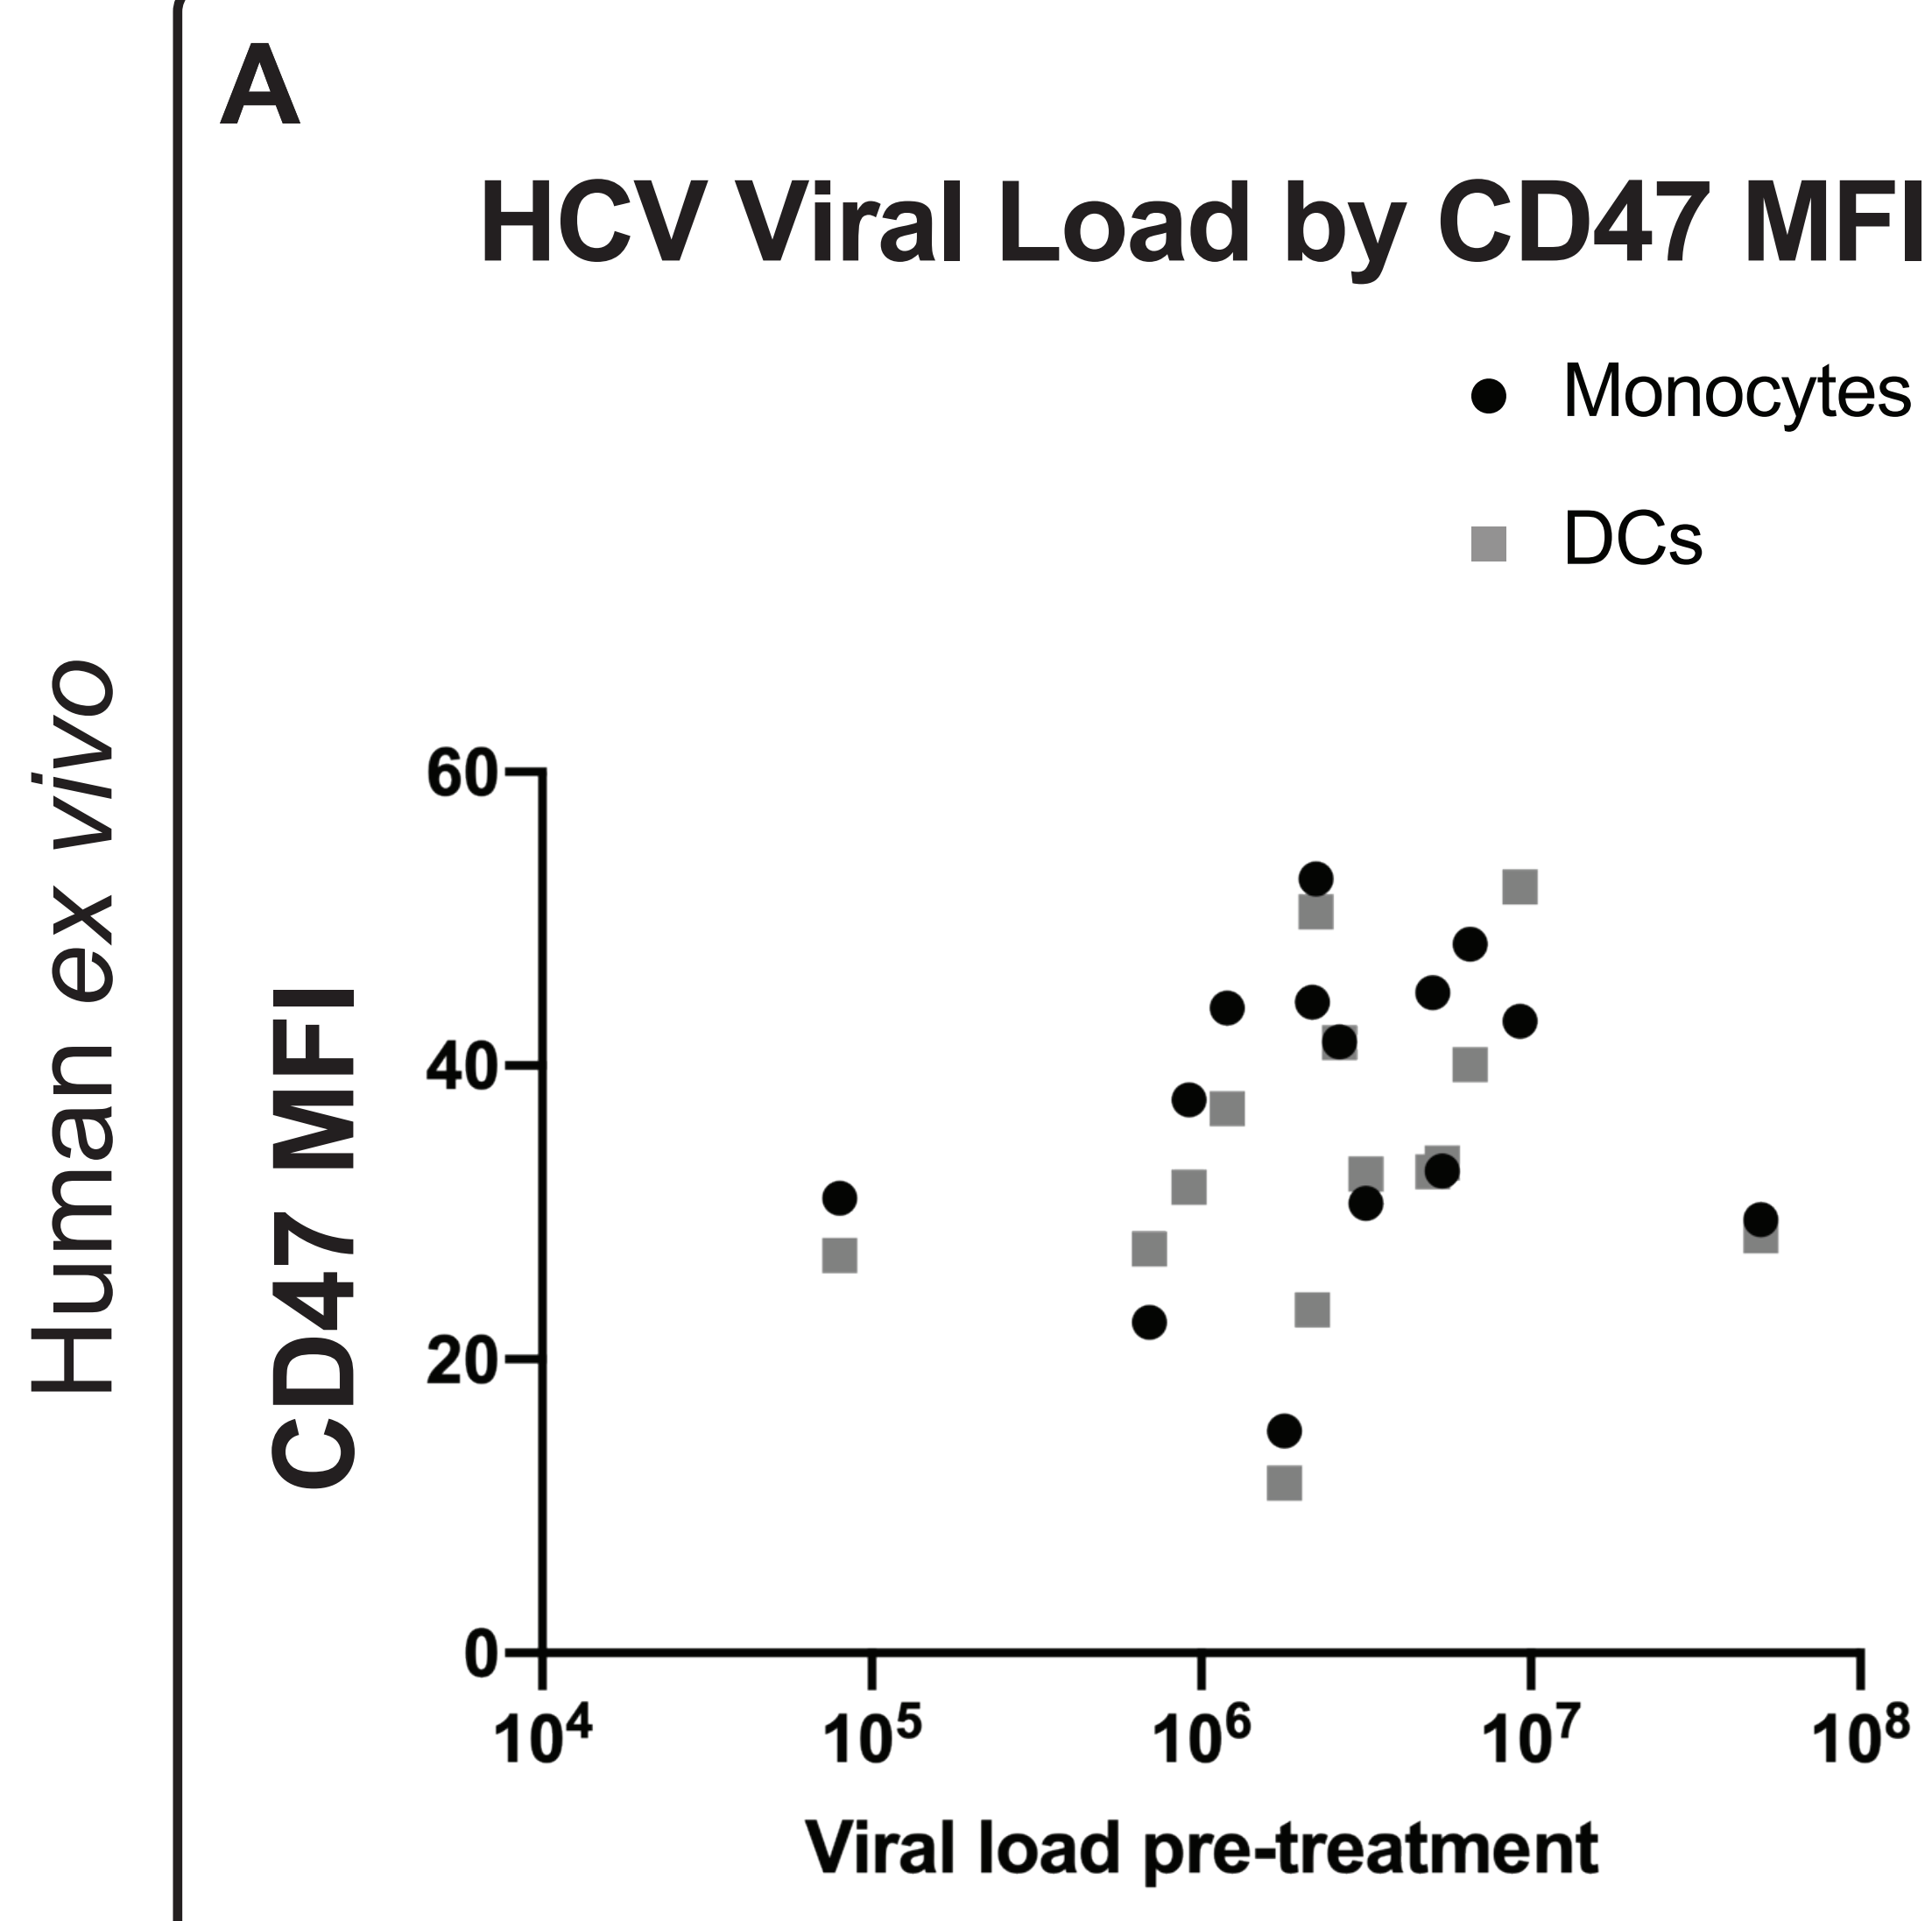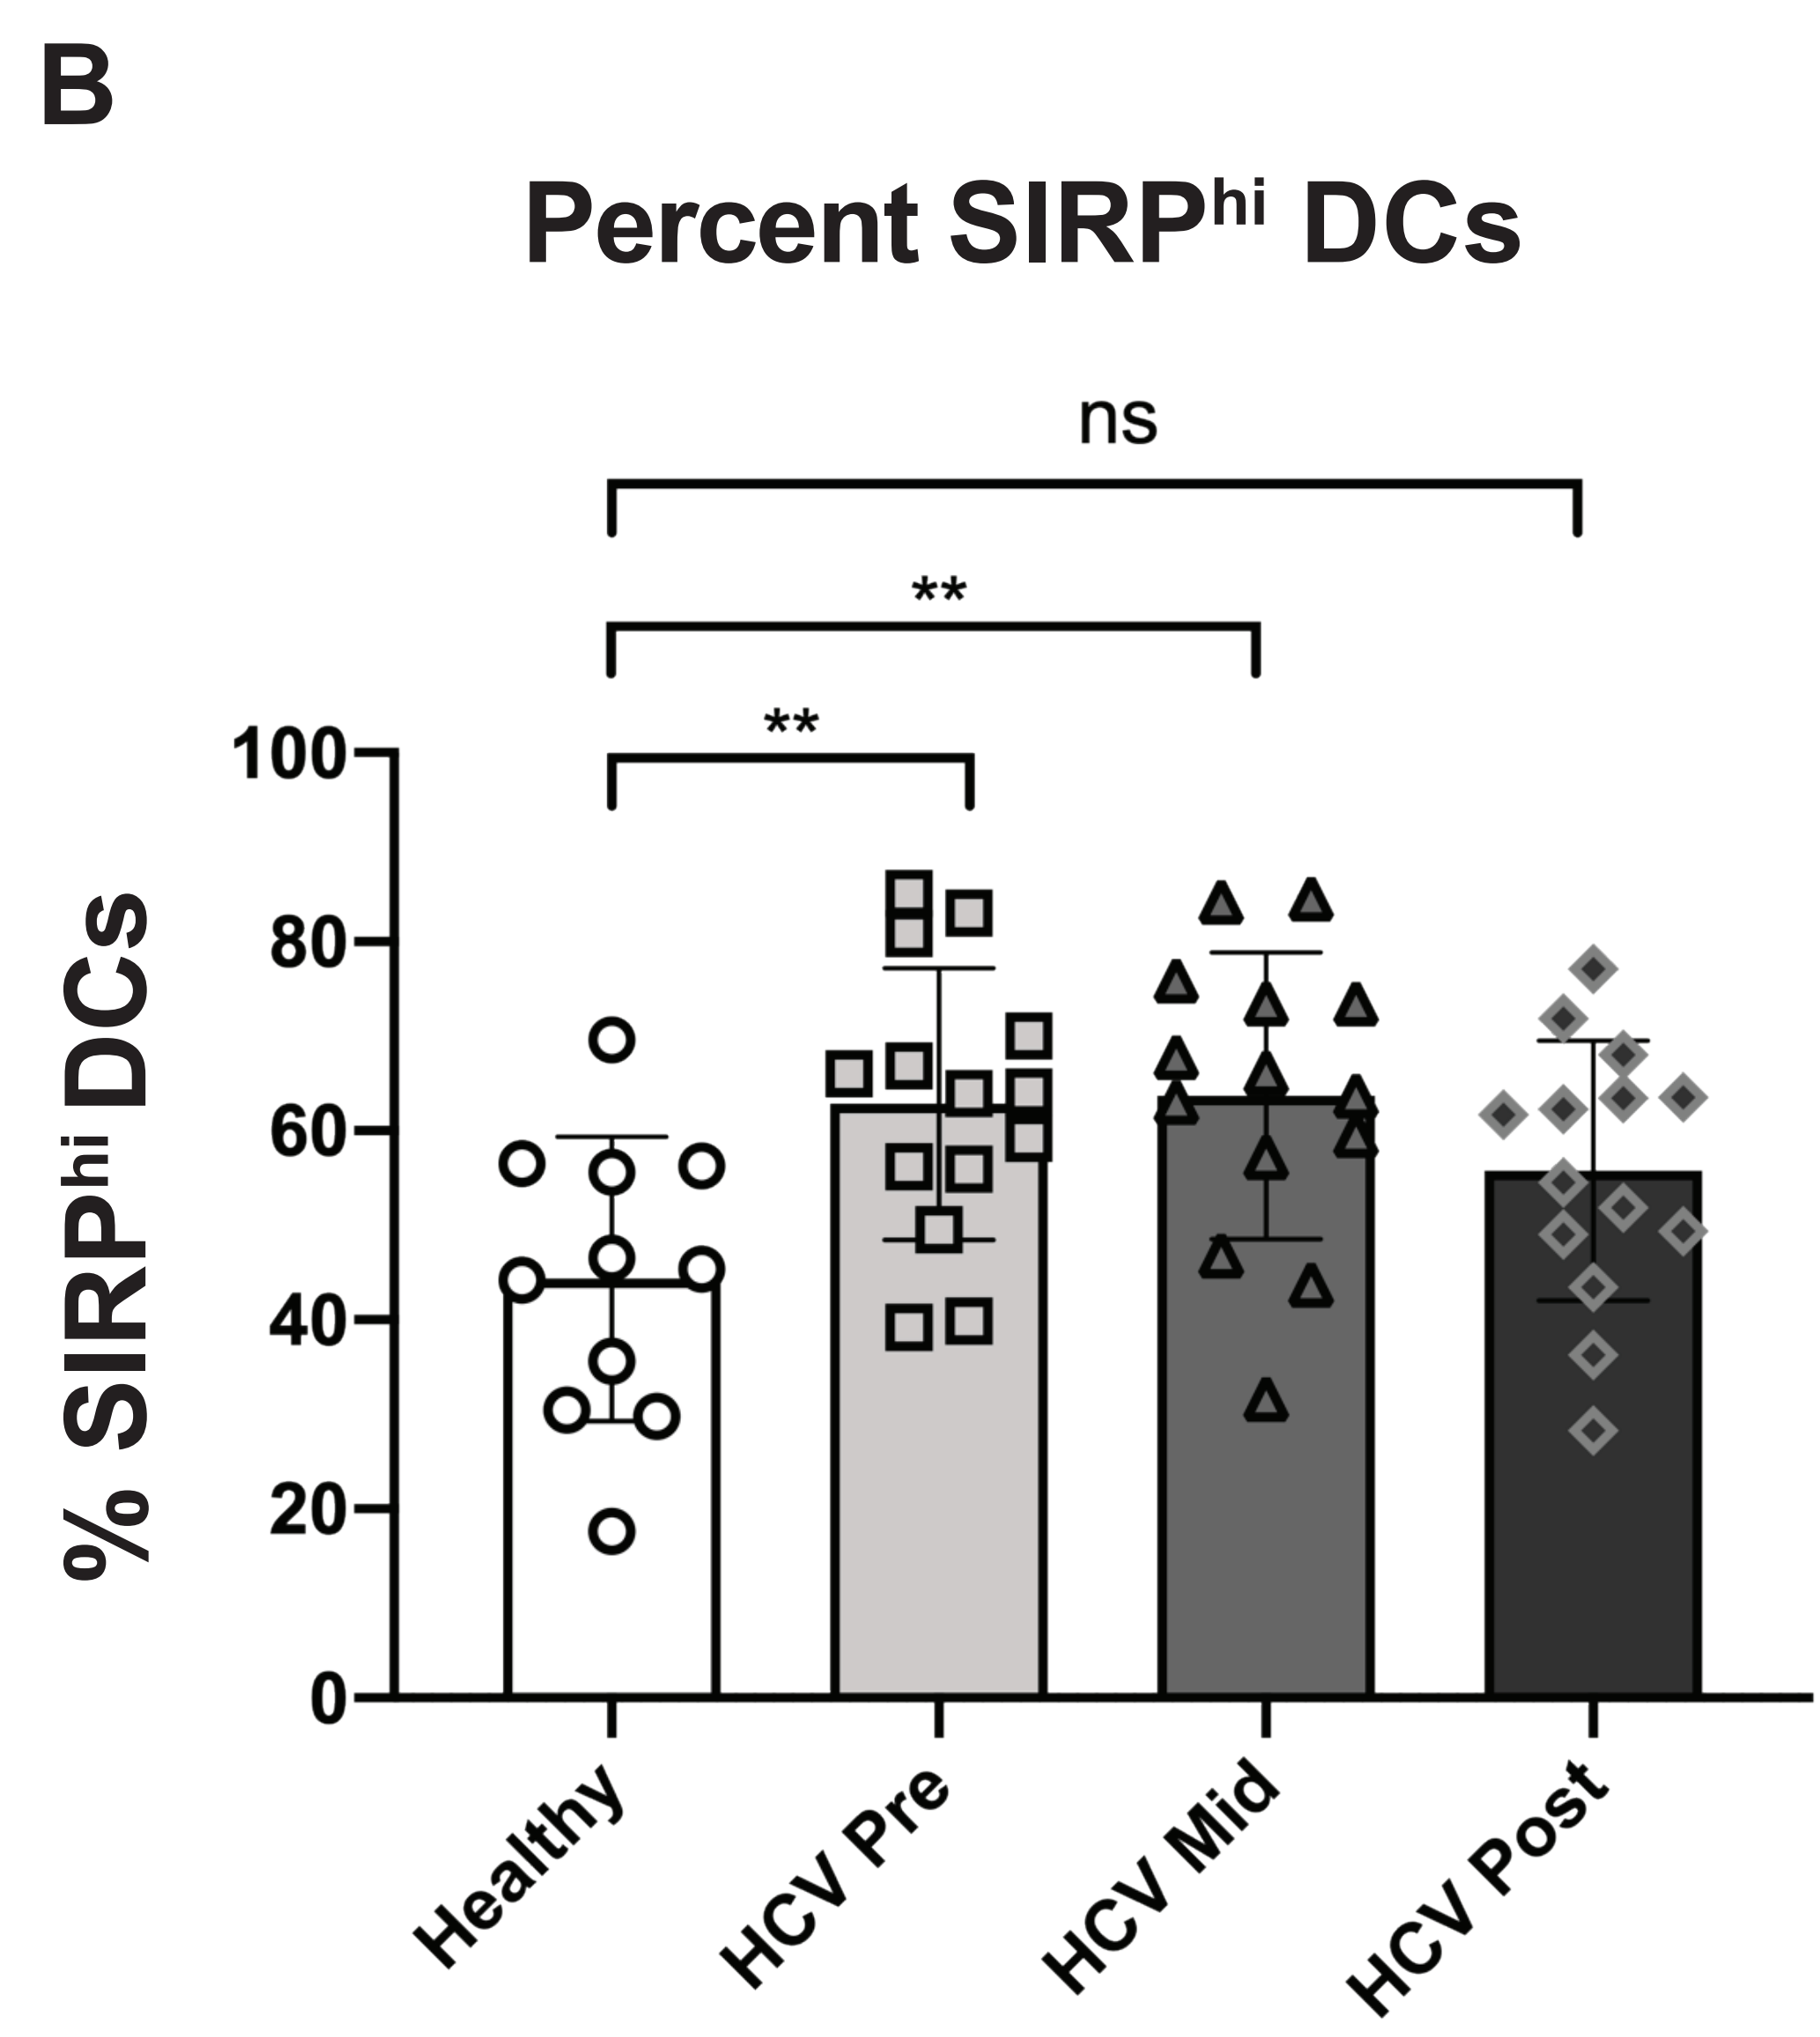

Supplement: mBio.01293-20-sf001.pdf [file mBio.01293-20-sf001.pdf]
